# Supplementary material for: A nationwide nested case-control study indicates an increased risk of acute interstitial nephritis with proton pump inhibitor use
Source: PubMed Central journal article supplement — Kidney Int. 2014 Mar 19;86(4):837–44. doi: 10.1038/ki.2014.74 (PMC4184187; doi:10.1038/ki.2014.74), 2014-03-19
Supplement: ki201474x1.pdf [file ki201474x1.pdf]

## Supplementary Tables: Proton pump inhibitors and risk of acute interstitial nephritis

*Supplementary Table 1. Socioeconomic status of cases and matched controls*

|                                 | <b>Definite<br/>Cases<br/>(n=46)</b> | <b>Controls<br/>(n=460)</b> | <b>All<br/>Cases<br/>(n=72)</b> | <b>Controls<br/>(n=719)</b> |
|---------------------------------|--------------------------------------|-----------------------------|---------------------------------|-----------------------------|
| <b>NZDep06 quintile* [n(%)]</b> |                                      |                             |                                 |                             |
| 1                               | 9 (19.6)                             | 85 (18.5)                   | 10 (13.9)                       | 131 (18.2)                  |
| 2                               | 11 (23.9)                            | 94 (20.4)                   | 16 (22.2)                       | 147 (20.5)                  |
| 3                               | 8 (17.4)                             | 106 (23.0)                  | 13 (18.1)                       | 166 (23.1)                  |
| 4                               | 9 (19.6)                             | 109 (23.7)                  | 17 (23.6)                       | 175 (24.3)                  |
| 5                               | 9 (19.6)                             | 66 (14.4)                   | 16 (22.2)                       | 100 (13.9)                  |

\*New Zealand Deprivation Index 2006, an area-based measure of socioeconomic deprivation based on census data (1 = least deprived)

*Supplementary Table 2. Total daily dose in current users of the proton pump inhibitors omeprazole, pantoprazole, and lansoprazole at the last dispensing before the index date*

|                  | <b>Definite<br/>Cases<br/>(n=35)</b> | <b>Controls<br/>(n=207)</b> | <b>All<br/>Cases<br/>(n=55)</b> | <b>Controls<br/>(n=332)</b> |
|------------------|--------------------------------------|-----------------------------|---------------------------------|-----------------------------|
| “Low” dose*      | 5 (14.3)                             | 14 (6.8)                    | 5 (9.1)                         | 22 (6.6)                    |
| “Standard” dose† | 22 (62.9)                            | 137 (66.2)                  | 35 (63.6)                       | 212 (63.9)                  |
| “High” dose‡     | 8 (22.9)                             | 56 (27.1)                   | 15 (27.3)                       | 98 (29.5)                   |

\*Omeprazole<20mg, pantoprazole<40mg, lansoprazole<30mg

†Omeprazole=20mg, pantoprazole=40mg, lansoprazole=30mg

‡Omeprazole>20mg, pantoprazole>40mg, lansoprazole>30mg

*Supplementary Table 3.* Risk of acute interstitial nephritis in current users of the proton pump inhibitors omeprazole, pantoprazole, or lansoprazole (by total daily dose) compared to past users

|                               | Cases | Controls | Matched odds ratio<br>(95% CI) | P-value |
|-------------------------------|-------|----------|--------------------------------|---------|
| <b>Definite cases*</b>        |       |          |                                |         |
| “Low” dose <sup>†</sup>       | 5     | 14       | 10.75 (2.89 – 39.92)           | <0.001  |
| “Standard” dose <sup>‡</sup>  | 22    | 137      | 4.87 (1.99 – 11.93)            | 0.001   |
| “High” dose <sup>§</sup>      | 8     | 56       | 4.14 (1.43 – 11.99)            | 0.009   |
| Past use                      | 7     | 197      | 1.0                            | —       |
| <b>All cases<sup>  </sup></b> |       |          |                                |         |
| “Low” dose <sup>†</sup>       | 5     | 22       | 6.46 (2.02 – 20.68)            | 0.002   |
| “Standard” dose <sup>‡</sup>  | 35    | 212      | 4.83 (2.34 – 9.98)             | <0.001  |
| “High” dose <sup>§</sup>      | 15    | 98       | 4.38 (1.92 – 9.99)             | <0.001  |
| Past use                      | 12    | 298      | 1.0                            | —       |

\*Verified by discharge letter and renal biopsy

<sup>†</sup>Omeprazole<20mg, pantoprazole<40mg, lansoprazole<30mg

<sup>‡</sup>Omeprazole=20mg, pantoprazole=40mg, lansoprazole=30mg

<sup>§</sup>Omeprazole>20mg, pantoprazole>40mg, lansoprazole>30mg

<sup>||</sup>Definite and probable (verified by discharge letter only) cases

*Supplementary Table 4.* Risk of acute interstitial nephritis in current users of the proton pump inhibitors omeprazole, pantoprazole, or lansoprazole, by duration of current use

|                                         | Cases | Controls | Adjusted* unmatched<br>odds ratio (95% CI) | P-value |
|-----------------------------------------|-------|----------|--------------------------------------------|---------|
| <b>Definite cases</b>                   |       |          |                                            |         |
|                                         | n=18  | n=101    |                                            |         |
| ≤180 days<br>current use                | 15    | 83       | 1.12 (0.29 – 4.31)                         | 0.866   |
| >180 days<br>current use<br>(reference) | 3     | 18       | 1.0                                        | —       |
| <b>All cases</b>                        |       |          |                                            |         |
|                                         | n=24  | n=164    |                                            |         |
| ≤180 days<br>current use                | 21    | 133      | 1.69 (0.47 – 6.09)                         | 0.419   |
| >180 days<br>current use<br>(reference) | 3     | 31       | 1.0                                        | —       |

\*Adjusted for the matching factors (birth year and sex)

*Supplementary Table 5.* International Classification of Diseases 9<sup>th</sup> revision Australian Modification codes (ICD-9-AM) used to exclude study cohort members with kidney disease diagnoses before cohort entry

| <b>Description</b>                                          | <b>ICD-9-AM</b>                                        |
|-------------------------------------------------------------|--------------------------------------------------------|
| Acute glomerulonephritis                                    | 5800, 5804, 58081, 58089, 5809                         |
| Nephrotic syndrome                                          | 5810, 5811, 5812, 5813, 58181, 58189, 5819             |
| Chronic glomerulonephritis                                  | 5820, 5821, 5822, 5824, 58281, 58289, 5829             |
| Nephritis and nephropathy                                   | 5830, 5831, 5832, 5834, 5836, 5837, 58381, 58389, 5839 |
| Acute renal failure                                         | 5845, 5846, 5847, 5848, 5849                           |
| Chronic renal impairment                                    | 5851                                                   |
| Chronic renal failure                                       | 5859                                                   |
| Renal failure, unspecified                                  | 586                                                    |
| Chronic pyelonephritis                                      | 59000, 59001                                           |
| Acute pyelonephritis                                        | 59010, 59011                                           |
| Renal and perinephric abscess                               | 5902                                                   |
| Pyelonephritis, unspecified                                 | 59080                                                  |
| Pyelitis or pyelonephritis in diseases classified elsewhere | 59081                                                  |
| Postural proteinuria                                        | 5936                                                   |

*Supplementary Table 6.* International Classification of Diseases 10<sup>th</sup> revision Australian Modification codes (ICD-10-AM) used to exclude study cohort members with kidney disease diagnoses before cohort entry

| <b>Description</b>                                                          | <b>ICD-10-AM</b>                                           |
|-----------------------------------------------------------------------------|------------------------------------------------------------|
| Acute nephritic syndrome                                                    | N000, N001, N002, N003, N004, N005, N006, N007, N008, N009 |
| Rapidly progressive nephritic syndrome                                      | N010, N011, N012, N013, N014, N015, N016, N017, N018, N019 |
| Recurrent and persistent haematuria                                         | N020, N021, N022, N023, N024, N025, N026, N027, N028, N029 |
| Chronic nephritic syndrome                                                  | N030, N031, N032, N033, N034, N035, N036, N037, N038, N039 |
| Nephrotic syndrome                                                          | N040, N041, N042, N043, N044, N045, N046, N047, N048, N049 |
| Unspecified nephritic syndrome                                              | N050, N051, N052, N053, N054, N055, N056, N057, N058, N059 |
| Isolated proteinuria                                                        | N060, N061, N062, N063, N064, N065, N066, N067, N068, N069 |
| Hereditary nephropathy                                                      | N070, N071, N072, N073, N074, N075, N076, N077, N078, N079 |
| Glomerular disorders                                                        | N080, N081, N082, N083, N084, N085, N088                   |
| Acute tubulo-interstitial nephritis                                         | N10                                                        |
| Other chronic tubulo-interstitial nephritis                                 | N118                                                       |
| Chronic tubulo-interstitial nephritis, unspecified                          | N119                                                       |
| Tubulo-interstitial nephritis, not specified as acute or chronic            | N12                                                        |
| Analgesic nephropathy                                                       | N140                                                       |
| Nephropathy induced by other drugs, medicaments and biological substances   | N141                                                       |
| Nephropathy induced by unspecified drug, medicament or biological substance | N142                                                       |
| Nephropathy induced by heavy metals                                         | N143                                                       |
| Toxic nephropathy, not elsewhere classified                                 | N144                                                       |
| Balkan nephropathy                                                          | N150                                                       |
| Renal and perinephric abscess                                               | N151                                                       |
| Other specified renal tubulo-interstitial diseases                          | N158                                                       |
| Renal tubulo-interstitial disease, unspecified                              | N159                                                       |
| Renal tubulo-interstitial disorders                                         | N160, N161, N162, N163, N164, N165, N168                   |
| Acute renal failure                                                         | N170, N171, N172, N178, N179                               |
| End-stage renal disease                                                     | N180                                                       |
| Other chronic renal failure                                                 | N188                                                       |
| Unspecified chronic renal failure                                           | N1890                                                      |
| Chronic renal impairment                                                    | N1891                                                      |

*Supplementary Table 7.* International Classification of Diseases 10<sup>th</sup> revision Australian Modification codes (ICD-10-AM) that were used to identify, and then exclude, potential cases who had a kidney or urinary tract infection (patients concurrently diagnosed with N10 or N12 and any of the ICD-10-AM codes listed in the table were excluded, regardless of whether other ICD-10-AM codes were listed)

| <b>ICD-10-AM</b> | <b>Description</b>                                                                             |
|------------------|------------------------------------------------------------------------------------------------|
| A4151            | Sepsis due to other Gram-negative organisms                                                    |
| B962             | <i>Escherichia coli</i> [ <i>E.coli</i> ] as the cause of disease classified to other chapters |
| N110             | Non-obstructive reflux-associated chronic pyelonephritis                                       |
| N111             | Chronic obstructive pyelonephritis                                                             |
| N309             | Cystitis, unspecified                                                                          |
| N390             | Urinary tract infection, site not specified                                                    |
| O230             | Infections of kidney in pregnancy                                                              |
| O234             | Unspecified infection of urinary tract in pregnancy                                            |
| O862             | Urinary tract infection following delivery                                                     |

*Supplementary Table 8.* International Classification of Diseases 10<sup>th</sup> revision Australian Modification codes (ICD-10-AM) that were used to identify, and then exclude, potential cases who had a kidney or urinary tract infection and had not already been excluded according to Table A3 (patients concurrently diagnosed with N10 or N12 and any of the ICD-10-AM codes listed in the table were excluded, provided there were no other ICD-10-AM codes listed)

| <b>ICD-10-AM</b> | <b>Description</b>                                                                     |
|------------------|----------------------------------------------------------------------------------------|
| B950 – B958      | Streptococcus and staphylococcus as the cause of diseases classified to other chapters |
| B960 – B968      | Other specified bacterial agents as the cause of diseases classified to other chapters |
| B970 – B978      | Viral agents as the cause of disease classified to other chapters                      |

*Supplementary Table 9. Government-subsidised prescription drugs listed in the New Zealand formulary known or suspected of increasing the risk of interstitial nephritis, by therapeutic class*

|                                                                                                                                                                                                                                                                                                                                                                                                                                                                                                                                                                                                                                                                                                                                                                                                                  |                                                                                                                                                                                                                                                                                                                                                                                                                                                                                                                                                                                                                                                                                                                                                                                                                                                                   |                                                                                                                                                                                                                                                                                                                                                                                                                                                                                                                                                                                                                                                                                                                                                                                                                                                             |                                                                                                                                                                                                                                                                                                                                                                                                                                                                                                                                                                                                                                                                                                                                                                                                                                                                                                     |                                                                                                                                                                                                                                                                                                                                                                                                                                                                                                                                                                                                                                                                                                                                                                                                                                                                                                           |
|------------------------------------------------------------------------------------------------------------------------------------------------------------------------------------------------------------------------------------------------------------------------------------------------------------------------------------------------------------------------------------------------------------------------------------------------------------------------------------------------------------------------------------------------------------------------------------------------------------------------------------------------------------------------------------------------------------------------------------------------------------------------------------------------------------------|-------------------------------------------------------------------------------------------------------------------------------------------------------------------------------------------------------------------------------------------------------------------------------------------------------------------------------------------------------------------------------------------------------------------------------------------------------------------------------------------------------------------------------------------------------------------------------------------------------------------------------------------------------------------------------------------------------------------------------------------------------------------------------------------------------------------------------------------------------------------|-------------------------------------------------------------------------------------------------------------------------------------------------------------------------------------------------------------------------------------------------------------------------------------------------------------------------------------------------------------------------------------------------------------------------------------------------------------------------------------------------------------------------------------------------------------------------------------------------------------------------------------------------------------------------------------------------------------------------------------------------------------------------------------------------------------------------------------------------------------|-----------------------------------------------------------------------------------------------------------------------------------------------------------------------------------------------------------------------------------------------------------------------------------------------------------------------------------------------------------------------------------------------------------------------------------------------------------------------------------------------------------------------------------------------------------------------------------------------------------------------------------------------------------------------------------------------------------------------------------------------------------------------------------------------------------------------------------------------------------------------------------------------------|-----------------------------------------------------------------------------------------------------------------------------------------------------------------------------------------------------------------------------------------------------------------------------------------------------------------------------------------------------------------------------------------------------------------------------------------------------------------------------------------------------------------------------------------------------------------------------------------------------------------------------------------------------------------------------------------------------------------------------------------------------------------------------------------------------------------------------------------------------------------------------------------------------------|
| <p><b>NSAIDs</b><br/>Diclofenac sodium<br/>Diflunisal<br/>Fenoprofen calcium<br/>Flurbiprofen<br/>Ibuprofen<br/>Indomethacin<br/>Ketoprofen<br/>Mefenamic acid<br/>Meloxicam<br/>Mesalazine<br/>Naproxen<br/>Naproxen sodium<br/>Phenylbutazone<br/>Piroxicam<br/>Sulindac<br/>Tenoxicam<br/>Tiaprofenic acid</p> <p><b>Other analgesics</b><br/>Nefopam hydrochloride<br/>Paracetamol<br/>Paracetamol with codeine<br/>Tramadol<br/>Tramadol hydrochloride</p> <p><b>Aspirin</b><br/>Aspirin<br/>Aspirin with chloroform<br/>Aspirin with codeine<br/>Aspirin with paracetamol and codeine</p> <p><b>Other anti-coagulants</b><br/>Phenindione<br/>Warfarin sodium</p> <p><b>Antibiotics</b><br/>Amoxicillin<br/>Amoxicillin clavulanate<br/>Azithromycin<br/>Aztreonam<br/>Benzathine<br/>benzylpenicillin</p> | <p>Benzylpenicillin sodium (Penicillin G)<br/>Cefaclor monohydrate<br/>Cefamandole nafate<br/>Cefazolin sodium<br/>Cefoxitin sodium<br/>Ceftriaxone sodium<br/>Cefuroxime axetil<br/>Cefuroxime sodium<br/>Cephalexin monohydrate<br/>Cephalothin sodium<br/>Cephradine<br/>Ciprofloxacin<br/>Clarithromycin</p> <p><b>Other antimicrobials</b><br/>Abacavir sulphate<br/>Abacavir sulphate with lamivudine<br/>Aciclovir<br/>Adefovir dipivoxil<br/>Atazanavir sulphate<br/>Dapsone<br/>Dapsone with pyrimethamine<br/>Darunavir<br/>Didanosine<br/>Efavirenz<br/>Emtricitabine<br/>Enfuvirtide<br/>Entecavir<br/>Ethambutol<br/>Ethambutol hydrochloride<br/>Etravirine<br/>Hexamine hippurate<br/>Hydroxychloroquine sulphate<br/>Indinavir<br/>Isoniazid<br/>Lamivudine<br/>Lopinavir with ritonavir<br/>Nevirapine<br/>Pyrazinamide<br/>Quinine sulphate</p> | <p>Raltegravir potassium<br/>Rifabutin<br/>Rifampicin<br/>Ritonavir<br/>Stavudine<br/>Tenofovir disoproxil fumarate<br/>Valaciclovir<br/>Zidovudine<br/>Zidovudine with lamivudine</p> <p><b>Anxiolytics</b><br/>Alprazolam<br/>Buspirone hydrochloride<br/>Diazepam<br/>Lorazepam<br/>Oxazepam</p> <p><b>Anti-epilepsy</b><br/>Carbamazepine<br/>Clobazam<br/>Clonazepam<br/>Ethosuximide<br/>Gabapentin<br/>Lamotrigine<br/>Levetiracetam<br/>Paraldehyde<br/>Phenobarbitone<br/>Phenobarbitone sodium<br/>Phenytoin sodium<br/>Primidone<br/>Sodium valproate<br/>Topiramate<br/>Vigabatrin</p> <p><b>Diuretics</b><br/>Amiloride<br/>Amiloride with frusemide<br/>Amiloride with hydrochlorothiazide<br/>Bendrofluazide<br/>Bumetanide<br/>Chlorothiazide<br/>Chlorthalidone<br/>Furosemide<br/>Indapamide<br/>Triamterene with hydrochlorothiazide</p> | <p><b>ACE inhibitors</b><br/>Captopril<br/>Captopril with hydrochlorothiazide<br/>Cilazapril<br/>Cilazapril with hydrochlorothiazide<br/>Enalapril<br/>Enalapril with hydrochlorothiazide<br/>Lisinopril<br/>Lisinopril with hydrochlorothiazide<br/>Perindopril<br/>Quinapril<br/>Quinapril with hydrochlorothiazide<br/>Trandolapril</p> <p><b>Angiotensin II antagonists</b><br/>Candesartan<br/>Losartan<br/>Losartan with hydrochlorothiazide</p> <p><b>Beta blockers</b><br/>Atenolol<br/>Atenolol with chlorthalidone<br/>Carvedilol<br/>Celiprolol<br/>Labetalol<br/>Metoprolol succinate<br/>Metoprolol tartrate<br/>Nadolol<br/>Pindolol<br/>Pindolol with clopamide<br/>Propranolol<br/>Sotalol<br/>Timolol<br/>Timolol maleate<br/>Timolol maleate with pilocarpine</p> <p><b>Calcium channel blockers</b><br/>Amlodipine<br/>Diltiazem hydrochloride<br/>Felodipine<br/>Isradipine</p> | <p>Nifedipine<br/>Perhexiline maleate<br/>Verapamil hydrochloride</p> <p><b>H2 receptor antagonists</b><br/>Cimetidine<br/>Famotidine<br/>Ranitidine hydrochloride</p> <p><b>Immune modulators</b><br/>Interferon alpha-2a<br/>Interferon alpha-2a with ribavirin<br/>Interferon alpha-2b<br/>Interferon alpha-n<br/>Interferon beta-1-alpha<br/>Interferon beta-1-beta<br/>Interferon gamma-1b<br/>Pegylated interferon alpha-2a<br/>Pegylated interferon alpha-2b<br/>Pegylated interferon alpha-2b with ribavirin</p> <p><b>Other drugs</b><br/>Allopurinol<br/>Azathioprine<br/>Bismuth carbonate<br/>Bismuth subcitrate, metronidazole and tetracycline<br/>Bismuth subnitrate<br/>Carbimazole<br/>Chlorpropamide<br/>Clofibrate<br/>Clozapine<br/>Griseofulvin<br/>Methyldopa<br/>Methyldopa with hydrochlorothiazide<br/>Penicillamine<br/>Probenecid<br/>Propylthiouracil<br/>Sulphinpyrazone</p> |
|------------------------------------------------------------------------------------------------------------------------------------------------------------------------------------------------------------------------------------------------------------------------------------------------------------------------------------------------------------------------------------------------------------------------------------------------------------------------------------------------------------------------------------------------------------------------------------------------------------------------------------------------------------------------------------------------------------------------------------------------------------------------------------------------------------------|-------------------------------------------------------------------------------------------------------------------------------------------------------------------------------------------------------------------------------------------------------------------------------------------------------------------------------------------------------------------------------------------------------------------------------------------------------------------------------------------------------------------------------------------------------------------------------------------------------------------------------------------------------------------------------------------------------------------------------------------------------------------------------------------------------------------------------------------------------------------|-------------------------------------------------------------------------------------------------------------------------------------------------------------------------------------------------------------------------------------------------------------------------------------------------------------------------------------------------------------------------------------------------------------------------------------------------------------------------------------------------------------------------------------------------------------------------------------------------------------------------------------------------------------------------------------------------------------------------------------------------------------------------------------------------------------------------------------------------------------|-----------------------------------------------------------------------------------------------------------------------------------------------------------------------------------------------------------------------------------------------------------------------------------------------------------------------------------------------------------------------------------------------------------------------------------------------------------------------------------------------------------------------------------------------------------------------------------------------------------------------------------------------------------------------------------------------------------------------------------------------------------------------------------------------------------------------------------------------------------------------------------------------------|-----------------------------------------------------------------------------------------------------------------------------------------------------------------------------------------------------------------------------------------------------------------------------------------------------------------------------------------------------------------------------------------------------------------------------------------------------------------------------------------------------------------------------------------------------------------------------------------------------------------------------------------------------------------------------------------------------------------------------------------------------------------------------------------------------------------------------------------------------------------------------------------------------------|
